# Supplementary material for: The mechanism of the reduction of [AnO2]2+ (An = U, Np, Pu) in aqueous solution, and by Fe(ii) containing proteins and mineral surfaces, probed by DFT calculations
Source: Royal Society of Chemistry journal article supplement (doi:10.1039/c1dt10700c), 2011-01-01
Supplement: c1dt10700c.pdf [file c1dt10700c.pdf]

# The mechanism of the reduction of $[\text{AnO}_2]^{2+}$ (An=U, Np, Pu) in aqueous solution and by Fe(II) containing proteins and mineral surfaces, probed by DFT calculations.

**Mahesh Sundararajan<sup>1,a</sup>, Rajeev S Assary<sup>1,b</sup>, Ian H Hillier\*<sup>1</sup> and David J Vaughan<sup>2</sup>**

<sup>1</sup> *School of Chemistry, University of Manchester, Manchester, M13 9PL, UK,*

<sup>2</sup> *School of Earth, Atmospheric and Environmental Sciences, University of Manchester, Manchester M13 9PL, UK*

<sup>a</sup>*Theoretical Chemistry Section, Chemistry Group, Bhabha Atomic Research Centre, Mumbai – 400 085, INDIA*

<sup>b</sup> *Materials Science Division Argonne National Laboratory, Argonne, IL, USA*

**Supplementary Information**

Table S1. Bond lengths (Å) and spin densities of species (II) in *D. acetoxidans*, hydroxide and aqua complexes of U, Np and Pu di-nuclear models.

|                                | U    |           |      | Np   |           |      | Pu   |           |      |
|--------------------------------|------|-----------|------|------|-----------|------|------|-----------|------|
|                                | Dac  | Hydroxide | Aqua | Dac  | Hydroxide | Aqua | Dac  | Hydroxide | Aqua |
| Bond Lengths, Å                |      |           |      |      |           |      |      |           |      |
| A                              | 1.79 | 1.78      | 1.81 | 1.78 | 1.79      | 1.77 | 1.76 | 1.77      | 1.76 |
| B                              | 1.84 | 1.82      | 1.86 | 1.82 | 1.83      | 1.80 | 1.80 | 1.81      | 1.76 |
| C                              | 2.42 | 2.44      | 2.41 | 2.44 | 2.46      | 2.52 | 2.50 | 2.46      | 2.65 |
| D                              | 4.00 | 4.16      | 4.08 | 4.01 | 4.07      | 4.22 | 4.02 | 4.06      | 4.47 |
| E                              | 1.89 | 1.90      | 1.90 | 1.87 | 1.87      | 1.86 | 1.84 | 1.85      | 1.82 |
| F                              | 1.81 | 1.78      | 1.81 | 1.80 | 1.80      | 1.77 | 1.79 | 1.79      | 1.76 |
| Spin densities, e <sup>-</sup> |      |           |      |      |           |      |      |           |      |
| M <sup>VI</sup>                | 0.16 | 0.46      | 0.15 | 1.42 | 1.27      | 1.66 | 2.66 | 2.48      | 2.61 |
| M <sup>V</sup>                 | 0.96 | 0.67      | 0.90 | 1.99 | 2.16      | 1.73 | 3.07 | 3.29      | 3.07 |

Table S2. Bond lengths (Å) and spin densities of species (**III**) in *D. acetoxidans*, hydroxide and aqua complexes of U, Np and Pu di-nuclear models.

|                                | U    |           |      | Np   |           |      | Pu   |           |      |
|--------------------------------|------|-----------|------|------|-----------|------|------|-----------|------|
|                                | Dac  | Hydroxide | Aqua | Dac  | Hydroxide | Aqua | Dac  | Hydroxide | Aqua |
| Bond Lengths, Å                |      |           |      |      |           |      |      |           |      |
| A                              | 1.82 | 1.82      | 1.85 | 1.81 | 1.81      | 1.80 | 1.80 | 1.81      | 1.79 |
| B                              | 1.89 | 1.87      | 2.05 | 1.87 | 1.90      | 1.85 | 1.85 | 1.88      | 1.82 |
| C                              | 2.40 | 2.40      | 2.36 | 2.49 | 2.42      | 2.44 | 2.50 | 2.51      | 2.46 |
| D                              | 3.97 | 4.11      | 4.08 | 4.03 | 3.96      | 4.15 | 3.99 | 4.06      | 4.12 |
| E                              | 1.93 | 1.93      | 1.94 | 1.86 | 1.87      | 1.88 | 1.84 | 1.85      | 1.86 |
| F                              | 1.85 | 1.81      | 1.84 | 1.82 | 1.83      | 1.80 | 1.80 | 1.81      | 1.79 |
| Spin densities, e <sup>-</sup> |      |           |      |      |           |      |      |           |      |
| M <sup>V</sup>                 | 0.81 | 1.07      | 1.12 | 2.21 | 2.21      | 2.19 | 3.35 | 3.36      | 3.33 |
| M <sup>V</sup>                 | 1.40 | 1.14      | 1.13 | 2.33 | 2.24      | 2.24 | 3.39 | 3.41      | 3.39 |

Table S3. Bond lengths (Å) and spin densities of species (**IV**) in *D. acetoxidans*, hydroxide and aqua complexes of U, Np and Pu di-nuclear models.

|                                | U    |           |      | Np   |           |      | Pu   |           |      |
|--------------------------------|------|-----------|------|------|-----------|------|------|-----------|------|
|                                | Dac  | Hydroxide | Aqua | Dac  | Hydroxide | Aqua | Dac  | Hydroxide | Aqua |
| Bond Lengths, Å                |      |           |      |      |           |      |      |           |      |
| A                              | 1.80 | 1.79      | 1.81 | 1.78 | 1.80      | 1.78 | 1.77 | 1.78      | 1.76 |
| B                              | 1.85 | 1.83      | 1.87 | 1.83 | 1.85      | 1.81 | 1.81 | 1.82      | 1.80 |
| C                              | 2.34 | 2.37      | 2.35 | 2.42 | 2.39      | 2.52 | 2.40 | 2.37      | 2.48 |
| D                              | 3.99 | 4.17      | 4.08 | 4.02 | 4.08      | 4.24 | 3.98 | 3.96      | 4.21 |
| E                              | 1.94 | 1.95      | 1.96 | 1.89 | 1.92      | 1.88 | 1.88 | 1.89      | 1.88 |
| F                              | 2.07 | 2.02      | 2.08 | 2.06 | 2.08      | 1.99 | 2.06 | 2.06      | 2.00 |
| Spin densities, e <sup>-</sup> |      |           |      |      |           |      |      |           |      |
| M <sup>VI</sup>                | 0.25 | 0.62      | 0.43 | 2.05 | 1.67      | 1.93 | 2.88 | 2.98      | 3.04 |
| M <sup>IV</sup>                | 1.94 | 1.59      | 1.78 | 2.42 | 2.82      | 2.54 | 3.88 | 3.82      | 3.72 |

Table S4. Bond lengths (Å) and spin densities of species (V) in *D. acetoxidans*, hydroxide and aqua complexes of U, Np and Pu di-nuclear models.

|                                | U    |           |      | Np                |           |                   | Pu   |           |      |
|--------------------------------|------|-----------|------|-------------------|-----------|-------------------|------|-----------|------|
|                                | Dac  | Hydroxide | Aqua | Dac               | Hydroxide | Aqua <sup>b</sup> | Dac  | Hydroxide | Aqua |
| Bond Lengths, Å                |      |           |      |                   |           |                   |      |           |      |
| A                              | 1.79 | 1.77      | 1.80 | 1.77              | 1.79      | 1.76              | 1.77 | 1.77      | 1.74 |
| B                              | 1.84 | 1.80      | 1.84 | 1.87 <sup>a</sup> | 1.82      | 1.76              | 1.79 | 1.80      | 1.76 |
| C                              | 2.54 | 2.54      | 2.58 | 2.40              | 2.57      | 27.30             | 2.42 | 2.58      | 2.66 |
| D                              | 4.13 | 4.59      | 4.43 | 3.72              | 4.44      | 29.15             | 4.34 | 4.41      | 4.74 |
| E                              | 2.19 | 2.28      | 2.22 | 2.22              | 2.21      | 2.01              | 2.24 | 2.18      | 2.24 |
| F                              | 2.04 | 1.99      | 2.05 | 2.05              | 2.04      | 2.01              | 2.05 | 2.06      | 2.00 |
| Spin densities, e <sup>-</sup> |      |           |      |                   |           |                   |      |           |      |
| M <sup>VI</sup>                | 0.01 | 0.27      | 0.14 | 1.30              | 1.29      | 2.14              | 2.46 | 2.43      | 2.47 |
| M <sup>IV</sup>                | 2.21 | 1.91      | 2.02 | 3.08              | 3.13      | 2.29              | 4.24 | 4.28      | 4.19 |

<sup>a</sup> Forms double bridged structure

<sup>b</sup> Spontaneously cleaves
